# Supplementary material for: The highly efficient electrocatalytic oxidation of 5-hydroxymethylfurfural on copper nanocrystalline/carbon hybrid catalysts: structure–function relations
Source: Royal Society of Chemistry journal article supplement (doi:10.1039/d2cy01165d), 2022-01-01
Supplement: d2cy01165d1.pdf [file d2cy01165d1.pdf]

## Highly efficient electrocatalytic oxidation of 5-hydroxymethylfurfural on copper nanocrystalline/carbon hybrid catalysts: Structure-function relations

Xingyu Lu,<sup>‡a,b</sup> Ke Qi,<sup>‡a,b</sup> Di Wang,<sup>a,b,c</sup> Xueya Dai,<sup>a,b</sup> Wei Qi<sup>\*a,b</sup>

<sup>a</sup> Shenyang National Laboratory for Materials Science Institute of Metal Research, Chinese Academy of Sciences  
Shenyang, Liaoning, 110016, P. R. China. E-mail: wqi@imr.ac.cn

<sup>b</sup> School of Materials Science and Engineering University of Science and Technology of China Shenyang,  
Liaoning, 110016, P. R. China.

<sup>c</sup> School of Pharmacy, Shenyang Pharmaceutical University, Shenyang, 110016, P. R. China.

E-mail: wqi@imr.ac.cn

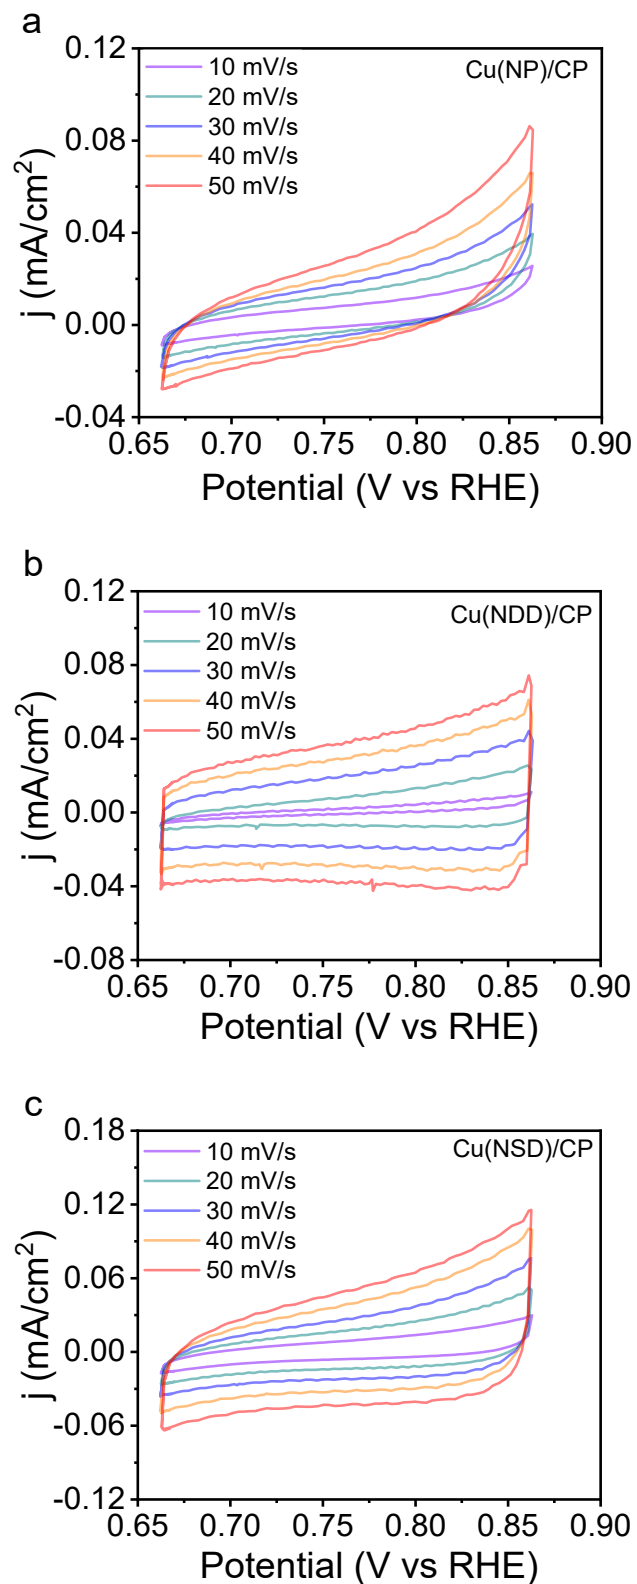

Figure S1. CV curves of Cu(NP)/CP, Cu(NDD)/CP and Cu(NSD)/CP catalysts at different scan rate from 10  $\text{mV s}^{-1}$  to 50  $\text{mV s}^{-1}$  in 0.1 M KOH solution with 5 mM HMF.

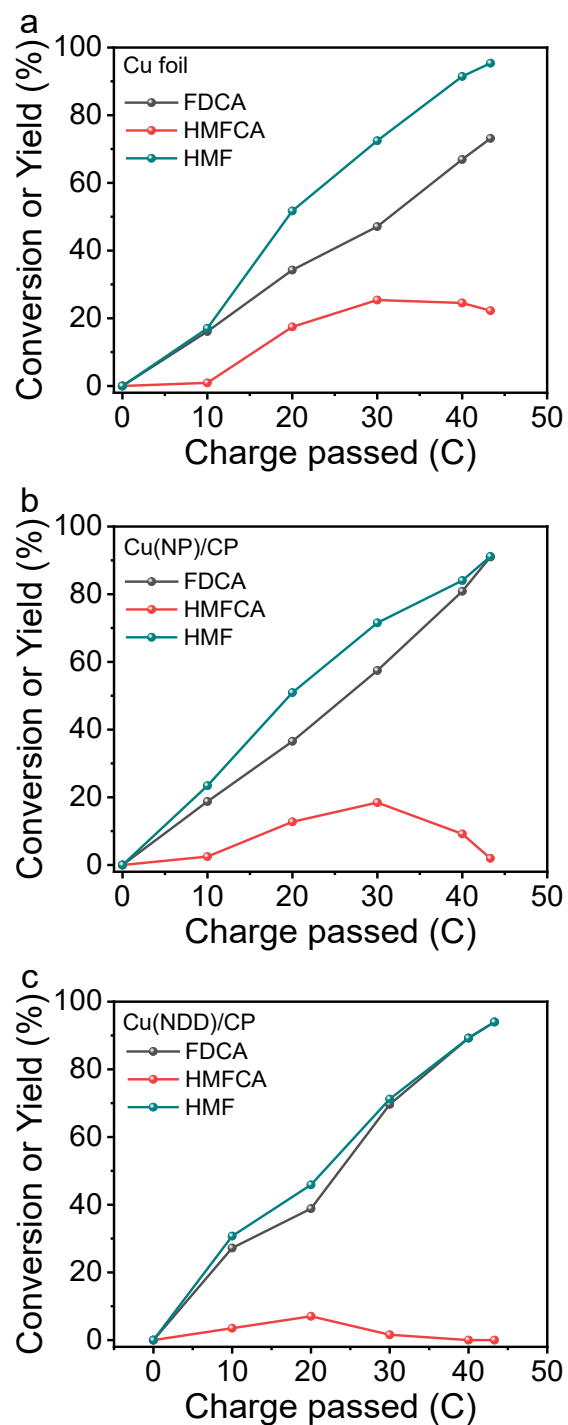

Figure S2. Conversion of HMF and selectivity of its oxidation products as function of charges passed through the electrode for Cu foil, Cu(NP)/CP and Cu(NDD)/CP catalysts at potential of 1.46 V<sub>RHE</sub>.

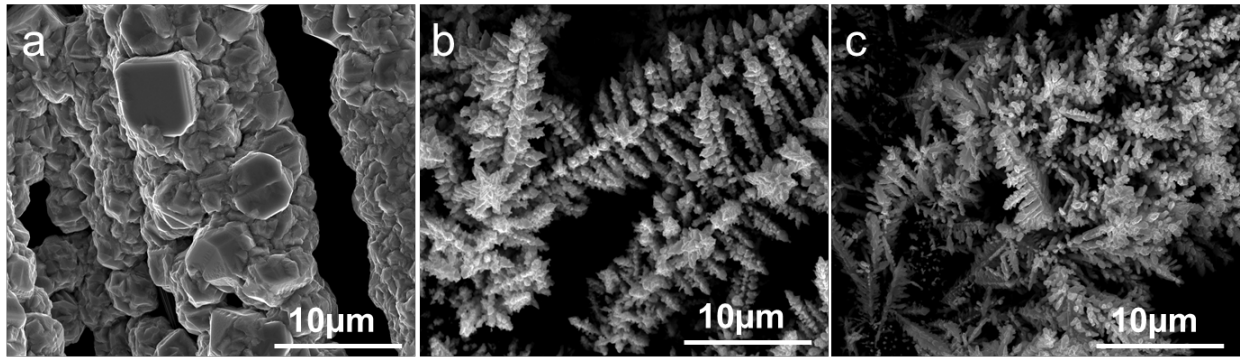

Figure S3. SEM images of (a) Cu(NP)/CP-used, (b) Cu(NDD)/CP-used and (c) Cu(NSD)/CP-used samples.

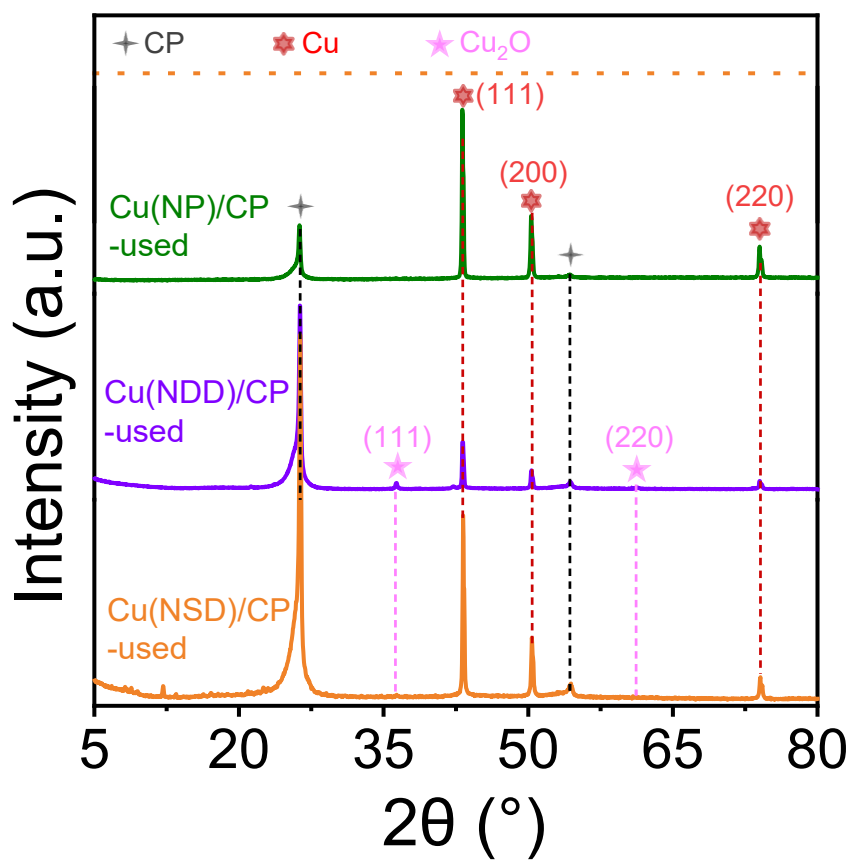

Figure S4. XRD pattern of Cu(NP)/CP-used, Cu(NDD)/CP-used and Cu(NSD)/CP-used catalysts.

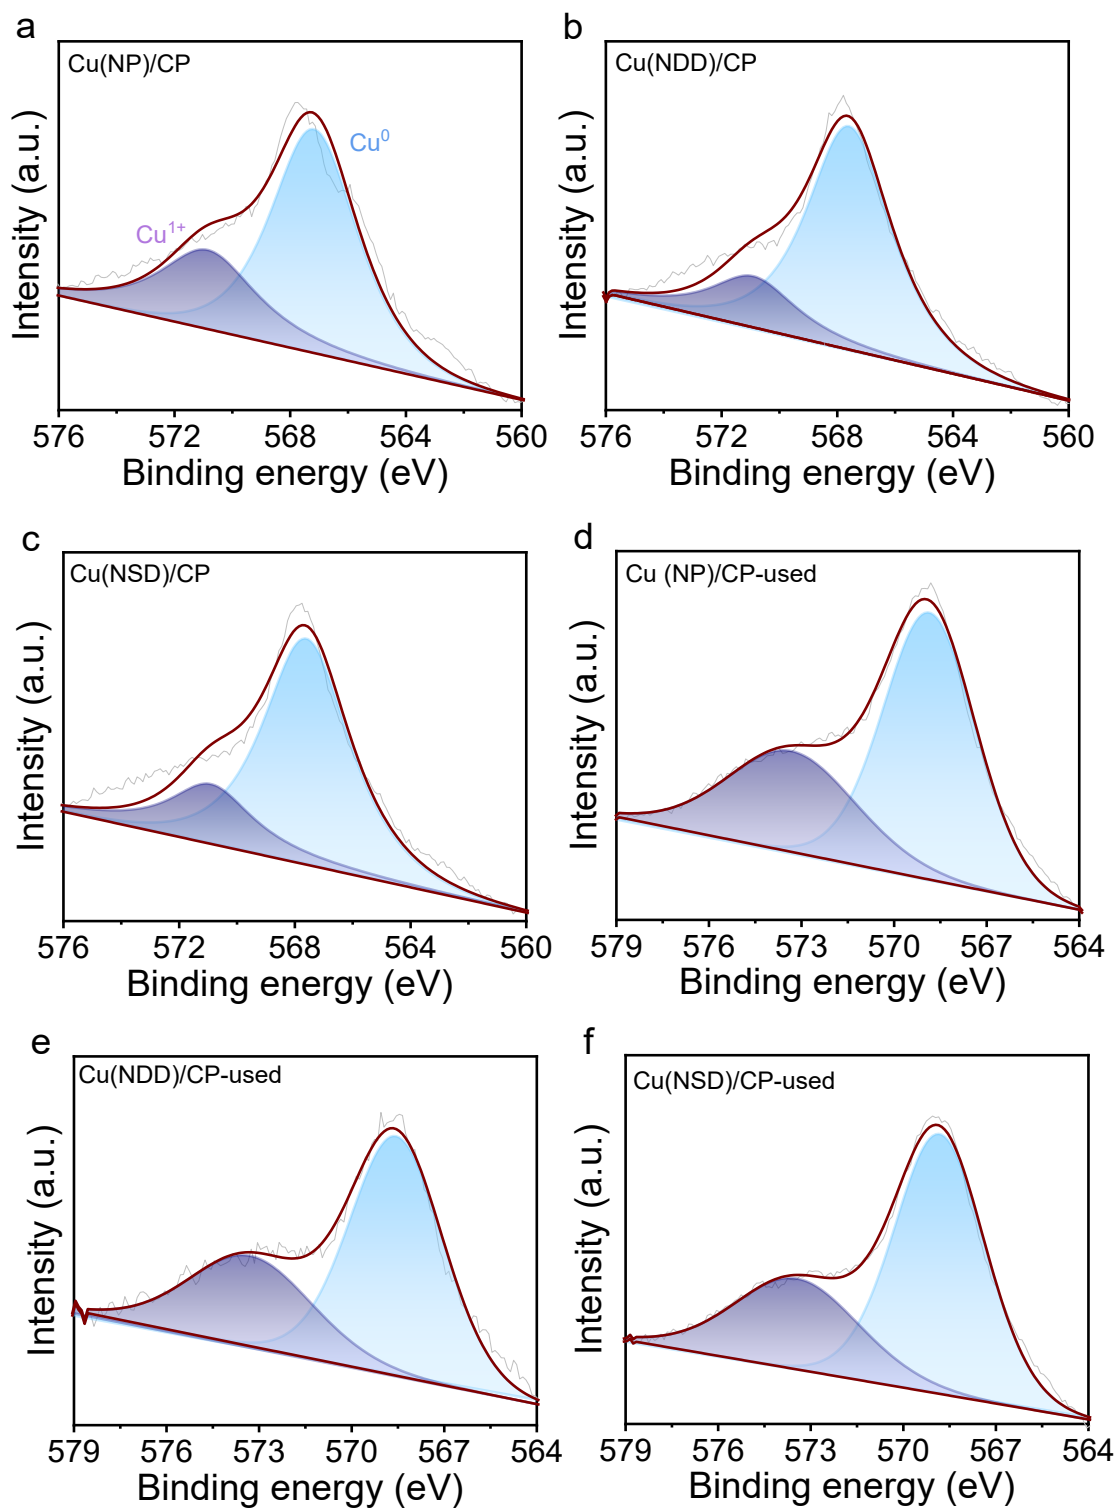

Figure S5. XPS Auger electron spectroscopy of (a)  $\text{Cu}(\text{NP})/\text{CP}$ , (b)  $\text{Cu}(\text{NDD})/\text{CP}$ , (c)  $\text{Cu}(\text{NSD})/\text{CP}$ , (d)  $\text{Cu}(\text{NP})/\text{CP}$ -used, (e)  $\text{Cu}(\text{NDD})/\text{CP}$ -used and (f)  $\text{Cu}(\text{NSD})/\text{CP}$ -used catalysts.

Table S1. Comparisons of catalytic performance of Cu(NSD)/CP and other reported Cu-base electrocatalysts.

| Catalyst                          | HMF concentration | Potential             | Electrolyte | Electrode area    | Reaction time | HMF conversion | FDCA yield | FDCA Selectivity |           |
|-----------------------------------|-------------------|-----------------------|-------------|-------------------|---------------|----------------|------------|------------------|-----------|
| <b>Cu(NSD)/CP</b>                 | 5 mM              | 1.46 V <sub>RHE</sub> | 0.1M KOH    | 3cm <sup>2</sup>  | 43.3 C        | 96.0%          | 96.0%      | 100.0%           | This work |
| <b>CuNi/C</b>                     | 5 mM              | 1.45 V <sub>RHE</sub> | 1 M KOH     | 1 cm <sup>2</sup> | 5 h           | 62.9%          | 28.3%      | 45.0%            | ref.1     |
| <b>CuNiO<sub>2</sub>/C</b>        | 5 mM              | 1.45 V <sub>RHE</sub> | 1 M KOH     | 1 cm <sup>2</sup> | 5 h           | 81.3%          | 43.6%      | 53.6%            | ref.1     |
| <b>Cu(OH)<sub>2</sub>/C</b>       | 5 mM              | 1.45 V <sub>RHE</sub> | 1 M KOH     | 1 cm <sup>2</sup> | 90 C          | 75.8%          | 71.2%      | 93.9%            | ref.1     |
| <b>CuNi(OH)<sub>2</sub>/C</b>     | 5 mM              | 1.45 V <sub>RHE</sub> | 1 M KOH     | 1 cm <sup>2</sup> | 90 C          | 100.0%         | 93.3%      | 93.3%            | ref.1     |
| <b>Cu(OH)<sub>2</sub> NWs/CuF</b> | 10 mM             | 1.69 V <sub>RHE</sub> | 0.1 M KOH   | 3 cm <sup>2</sup> | 206 min       | 96.4%          | 80.3%      | 83.3%            | ref.2     |
| <b>CuO NWs/CuF</b>                | 10 mM             | 1.64 V <sub>RHE</sub> | 0.1 M KOH   | 3 cm <sup>2</sup> | 89 min        | 99.4%          | 90.9%      | 91.4%            | ref.2     |
| <b>Nanocrystalline Cu Foam</b>    | 5 mM              | 1.62 V <sub>RHE</sub> | 0.1 M KOH   | 4 cm <sup>2</sup> | 41 C          | 99.9%          | 96.0%      | 96.1%            | ref.3     |

Table S2. Contents of Cu<sup>0</sup>, Cu<sup>1+</sup>, Cu<sup>2+</sup> on the surface of Cu(NP)/CP, Cu(NDD)/CP and Cu(NSD)/CP samples before and after electrooxidation HMF reaction.

| Catalyst        | peaks area       |                 |                 |
|-----------------|------------------|-----------------|-----------------|
|                 | Cu <sup>2+</sup> | Cu <sup>+</sup> | Cu <sup>0</sup> |
| Cu(NP)/CP       | 0.00             | 30.61           | 69.39           |
| Cu(NDD)/CP      | 0.00             | 19.75           | 80.25           |
| Cu(NSD)/CP      | 0.00             | 23.52           | 76.48           |
| Cu(NP)/CP-used  | 53.13            | 16.21           | 30.66           |
| Cu(NDD)/CP-used | 59.73            | 13.37           | 26.89           |
| Cu(NSD)/CP-used | 63.46            | 11.90           | 24.63           |

## references

- [1] H. Chen, J. Wang, Y. Yao, Z. Zhang, Z. Yang, J. Li, K. Chen, X. Lu, P. Ouyang, J. Fu, *ChemElectroChem* 2019, **6**, 5797-5801.
- [2] H. M. Pham, M. J. Kang, K.-A. Kim, C. G. Im, S. Y. Hwang, H. G. Cha, *Korean J. Chem. Eng.* 2020, **37**, 556-562.
- [3] D.-H. Nam, B. J. Taitt, K.-S. Choi, *ACS Catal.* 2018, **8**, 1197-1206.
